# Supplementary material for: Light-Dependent Aerobic Methane Oxidation Reduces Methane Emissions from Seasonally Stratified Lakes
Source: PubMed Central journal article supplement (PMC4508055; doi:10.1371/journal.pone.0132574), 2015-07-20
Supplement: pone.0132574.s006.pdf [file pone.0132574.s006.pdf]

| Probe        | Specificity                                | Permeabilization | % Formamide | Probe sequence (5'-3')                                                                 | Reference |
|--------------|--------------------------------------------|------------------|-------------|----------------------------------------------------------------------------------------|-----------|
| AAA-FW-641   | AOM-associated archaea, freshwater cluster | Proteinase K     | 60          | GGT CCC AAG CCT<br>ACC AGT                                                             | [1]       |
| AAA-FW-834   |                                            |                  |             | TGC GGT CGC ACC<br>GCA CCT                                                             |           |
| Alfa968      | Alphaproteobacteria                        | Lysozyme         | 35          | GGT AAG GTT CTG<br>CGC GIT                                                             | [2]       |
| ANME-1-350   | ANME-1                                     | Proteinase K     | 40          | AGT TTT CGC GCC<br>TGATGC                                                              | [3]       |
| ANME-2-538   | ANME-2                                     | SDS              | 40          | GGC TAC CAC TCG<br>GGC CGC                                                             | [4]       |
| ARCH915      | Most archaea                               | Proteinase K     | 35          | GTG CTC CCC CGC<br>CAA TTC CT                                                          | [5]       |
| EUB338 I-III | Most bacteria                              | Lysozyme         | 35          | GCT GCC TCC CGT<br>AGG AGT<br>GCA GCC ACC CGT<br>AGG TGT<br>GCT GCC ACC CGT<br>AGG TGT | [6]       |
| Ma450        | Alpha-MOB                                  | SDS              | 20          | ATC CAG GTA CCG<br>TCA TTA TC                                                          | [7]       |
| Mgamma84     | Gamma-MOB                                  | Lysozyme         | 20          | CCA CTC GTC AGC<br>GCC CGA                                                             | [7]       |
| Mgamma705    |                                            |                  |             | CTG GTG TTC CTT<br>CAG ATC                                                             |           |
| NON338       | Negative control                           | Lysozyme         | 35          | ACT CCT ACG GGA<br>GGC AGC                                                             | [8]       |

- Schubert CJ, Vazquez F, Lösekann-Behrens T, Knittel K, Tonolla M, Boetius A (2011) Evidence for anaerobic oxidation of methane in sediments of a freshwater system (Lago di Cadagno). *FEMS microbiology ecology* 76: 26-38.
- Neef A (1997) Anwendung der in situ-Einzell-Identifizierung von Bakterien zur Populations-Analyse in komplexen mikrobiellen Biozönosen. PhD thesis, Technische Universität München.
- Boetius A, Ravensschlag K, Schubert CJ, Rickert D, Widdel F, Gieseke A, et al. (2000) A marine microbial consortium apparently mediating anaerobic oxidation of methane. *Nature* 407: 623-626.
- Treude T, Niggemann J, Kallmeyer J, Wintersteller P, Schubert CJ, Boetius A, et al. (2005) Anaerobic oxidation of methane and sulfate reduction along the Chilean continental margin. *Geochimica et Cosmochimica Acta* 69: 2767-2779.
- Stahl D, Amann R (1991) Development and application of nucleic acid probes in bacterial systematics; Goodfellow ESM, editor. Chichester, UK: John Wiley & Sons Ltd. 205-248 p.
- Daims H, Brühl A, Amann R, Schleifer K-H, Wagner M (1999) The Domain-specific Probe EUB338 is Insufficient for the Detection of all Bacteria: Development and Evaluation of a more Comprehensive Probe Set. *Systematic and Applied Microbiology* 22: 434-444.
- Eller G, Frenzel P (2001) Changes in activity and community structure of methane-oxidizing bacteria over the growth period of rice. *Applied and environmental microbiology* 67: 2395-2403.
- Wallner G, Amann R, Beisker W (1993) Optimizing fluorescent in situ hybridization with rRNA-targeted oligonucleotide probes for flow cytometric identification of microorganisms. *Cytometry* 14: 136-143.
