# Supplementary material for: Light-Dependent Aerobic Methane Oxidation Reduces Methane Emissions from Seasonally Stratified Lakes
Source: PubMed Central journal article supplement (PMC4508055; doi:10.1371/journal.pone.0132574), 2015-07-20
Supplement: pone.0132574.s007.pdf [file pone.0132574.s007.pdf]

| <b>Depth [m]</b> | <b>Primary production [<math>\mu\text{M d}^{-1}</math>]</b> |
|------------------|-------------------------------------------------------------|
| 8                | $4.34 \pm 0.35$                                             |
| 9                | $2.71 \pm 0.08$                                             |
| 10               | $1.37 \pm 0.14$                                             |
| 11               | $0.43 \pm 0.16$                                             |
